# Supplementary material for: Biosynthetic Potential of a Novel Antarctic Actinobacterium Marisediminicola antarctica ZS314T Revealed by Genomic Data Mining and Pigment Characterization
Source: PubMed Central journal article supplement (PMC6669644; doi:10.3390/md17070388), 2019-07-01
Supplement: marinedrugs-17-00388-s001.pdf [file marinedrugs-17-00388-s001.pdf]

**Supplementary materials for**  
**Biosynthetic potential of a novel Antarctic actinobacterium *Marisediminicola***  
***antarctica* ZS314 revealed by genomic data mining and pigment characterization**

Li Liao<sup>a, #, \*</sup>, Shiyuan Su<sup>a, b, #</sup>, Bin Zhao<sup>a, c</sup>, Chengqi Fan<sup>d</sup>, Jin Zhang<sup>a</sup>, Huirong Li<sup>a</sup>, Bo Chen<sup>a, \*</sup>

<sup>a</sup>SOA Key Laboratory for Polar Science, Polar Research Institute of China, 451 Jinqiao Road, Shanghai, 200136, China

<sup>b</sup>College of Marine Sciences, Shanghai Ocean University, Shanghai, 201306, China

<sup>c</sup>School of Biotechnology, East China University of Science and Technology, Shanghai, 200237, China

<sup>d</sup>Key Laboratory of East China Sea & Oceanic Fishery Resources Exploitation and Utilization, Ministry of Agriculture, East China Sea Fisheries Research Institute, Chinese Academy of Fishery Sciences, Shanghai, 200090, China

<sup>#</sup>These authors contributed equally to this work.

\*Correspondence:

liaoli@pric.org.cn; chenbo@pric.org.cn

Polar Research Institute of China, 451 Jinqiao Road, Shanghai, 200136, China

Phone: 86-021-50385104; Fax: 86-021-58711663

Table S1. Gene organization of the five gene clusters predicted in the genome of *M. antarctica* ZS314.

| Gene ID   | start   | end     | length/bp | strand | annotation                                                   |
|-----------|---------|---------|-----------|--------|--------------------------------------------------------------|
| Cluster 1 |         |         |           |        |                                                              |
| orf1      | 355581  | 356897  | 1317      | +      | multidrug transporter<br>MATE                                |
| orf2      | 356955  | 358199  | 1245      | +      | major facilitator superfamily<br>MFS_1                       |
| orf3      | 358210  | 358905  | 696       | +      | hypothetical protein                                         |
| orf4      | 359086  | 359775  | 690       | +      | haloacid dehalogenase                                        |
| orf5      | 359786  | 360868  | 1083      | -      | monooxygenase                                                |
| orf6      | 360865  | 361413  | 549       | -      | isoprenylcysteine carboxyl<br>methyltransferase              |
| orf7      | 361401  | 362468  | 1068      | -      | stilbene synthase                                            |
| Cluster 2 |         |         |           |        |                                                              |
| orf1      | 538745  | 539290  | 546       | -      | isopentenyl-diphosphate<br>delta isomerase<br>geranylgeranyl |
| orf2      | 539313  | 540383  | 1071      | +      | pyrophosphate synthase<br>(CrtE)                             |
| orf3      | 540380  | 541261  | 882       | +      | phytoene synthase (CrtB)                                     |
| orf4      | 541258  | 542859  | 1602      | +      | phytoene desaturase (CrtI)                                   |
| orf5      | 542864  | 543217  | 354       | +      | lycopene cyclase (LbtA)                                      |
| orf6      | 543214  | 543738  | 525       | +      | lycopene beta-elongase<br>(LbtBC)                            |
| orf7      | 543735  | 544613  | 879       | +      | lycopene beta-elongase<br>(LbtBC)                            |
| Cluster 3 |         |         |           |        |                                                              |
| orf1      | 1181185 | 1181649 | 465       | -      | MarR family transcriptional<br>regulator                     |
| orf2      | 1181819 | 1182655 | 837       | +      | xanthorhodopsin                                              |
| orf3      | 1182674 | 1184125 | 1452      | +      | Lycopene beta and epsilon<br>cyclase<br>beta-carotene        |
| orf4      | 1184106 | 1185218 | 1113      | +      | 15,15'-monooxygenase                                         |
| orf5      | 1185436 | 1185690 | 255       | +      | hypothetical protein                                         |
| orf6      | 1185687 | 1187189 | 1503      | +      | alanine glycine permease                                     |
| Cluster 4 |         |         |           |        |                                                              |
| orf1      | 1194970 | 1195938 | 969       | +      | metalloregulator ArsR/SmtB<br>family transcription factor    |
| orf2      | 1196022 | 1196432 | 411       | +      | heat-shock protein HtpX                                      |
| orf3      | 1196435 | 1197103 | 669       | +      | arsenate<br>reductase/phosphatase                            |
| orf4      | 1197799 | 1201707 | 3909      | +      | amino acid adenylation                                       |

|           |         |         |      |   |                                                                      |
|-----------|---------|---------|------|---|----------------------------------------------------------------------|
|           |         |         |      |   | protein                                                              |
| orf5      | 1201713 | 1203038 | 1326 | + | peptidase M1                                                         |
| orf6      | 1203035 | 1203682 | 648  | - | hypothetical protein                                                 |
| orf7      | 1203679 | 1205013 | 1335 | - | hypothetical protein                                                 |
| Cluster 5 |         |         |      |   |                                                                      |
| orf1      | 2518025 | 2519089 | 1065 | + | oxidoreductase                                                       |
| orf2      | 2519086 | 2520108 | 1023 | + | epimerase                                                            |
| orf3      | 2520108 | 2521259 | 1152 | + | glutamine--scyllo-inositol<br>aminotransferase                       |
| orf4      | 2521252 | 2521902 | 651  | + | acetyltransferase                                                    |
| orf5      | 2521947 | 2523119 | 1173 | + | glycosyltransferase, family 1                                        |
| orf6      | 2523116 | 2524588 | 1473 | + | polysaccharide biosynthesis<br>protein                               |
| orf7      | 2524620 | 2525741 | 1122 | + | DegT/DnrJ/EryC1/StrS<br>aminotransferase                             |
| orf8      | 2525738 | 2526844 | 1107 | + | glycosyltransferase                                                  |
| orf9      | 2526852 | 2528084 | 1233 | + | glycosyltransferase group 1                                          |
| orf10     | 2528081 | 2528737 | 657  | + | hypothetical protein                                                 |
| orf11     | 2528734 | 2530671 | 1938 | + | O-antigen ligase family<br>protein                                   |
| orf12     | 2530768 | 2531865 | 1098 | - | glycosyltransferase family 4<br>protein                              |
| orf13     | 2531972 | 2533321 | 1350 | - | glycosyltransferase family 1                                         |
| orf14     | 2533477 | 2535285 | 1809 | + | asparagine synthase                                                  |
| orf15     | 2535298 | 2536146 | 849  | - | glycosyltransferase                                                  |
| orf16     | 2536143 | 2537042 | 900  | - | glycosyltransferase family 2<br>protein                              |
| orf17     | 2537144 | 2538295 | 1152 | - | hypothetical protein                                                 |
| orf18     | 2538518 | 2540257 | 1740 | - | hypothetical protein                                                 |
| orf19     | 2540504 | 2541436 | 933  | - | hypothetical protein                                                 |
| orf20     | 2541524 | 2542540 | 1017 | - | hypothetical protein                                                 |
| orf21     | 2542537 | 2543826 | 1290 | - | major Facilitator<br>Superfamily protein                             |
| orf22     | 2543840 | 2544382 | 543  | - | hypothetical protein                                                 |
| orf23     | 2544670 | 2546061 | 1392 | + | hypothetical protein                                                 |
| orf24     | 2546830 | 2548143 | 1314 | - | glycosyltransferase<br>sucrose synthase                              |
| orf25     | 2548140 | 2550344 | 2205 | - | (sucrose-UDP<br>glucosyltransferase)/glycosyl<br>transferase group 1 |
| orf26     | 2550506 | 2551939 | 1434 | - | flotillin family protein                                             |
| orf27     | 2552134 | 2552751 | 618  | + | flavin oxidoreductase                                                |
| orf28     | 2552712 | 2554775 | 2064 | + | acetyl-CoA synthetase                                                |
| orf29     | 2554883 | 2557579 | 2697 | + | HAD family hydrolase                                                 |

|       |         |         |     |   |                                           |
|-------|---------|---------|-----|---|-------------------------------------------|
| orf30 | 2557599 | 2558570 | 972 | - | nucleoside-diphosphate<br>sugar epimerase |
|-------|---------|---------|-----|---|-------------------------------------------|

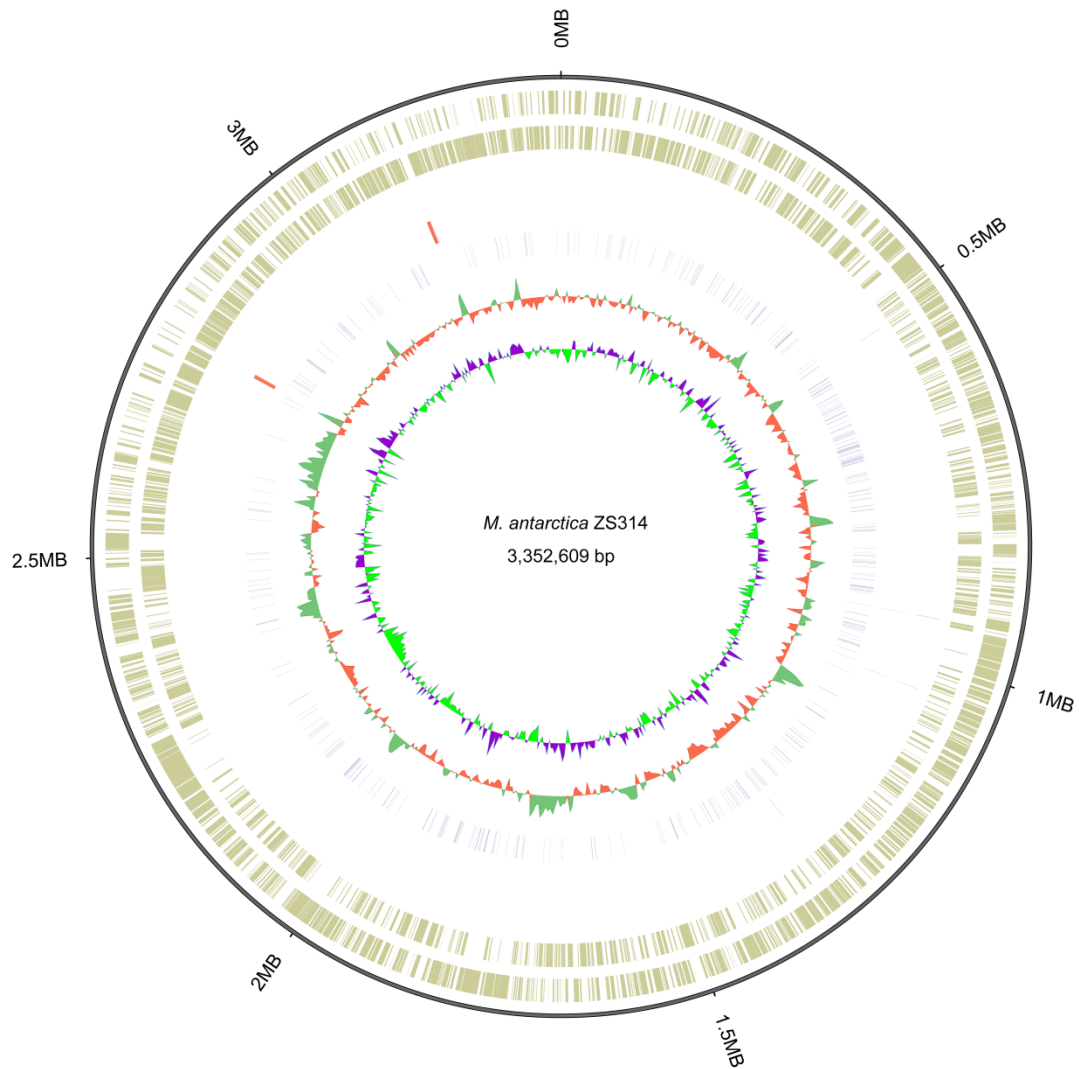

Figure S1. Circular genome map of *M. antarctica* ZS314. From outer to inner circle: genome size, protein-encoding genes in forward orientation, protein-encoding genes in reverse orientation, ncRNA in forward orientation, ncRNA in reverse orientation, repeat sequences, GC plot and GC skew.

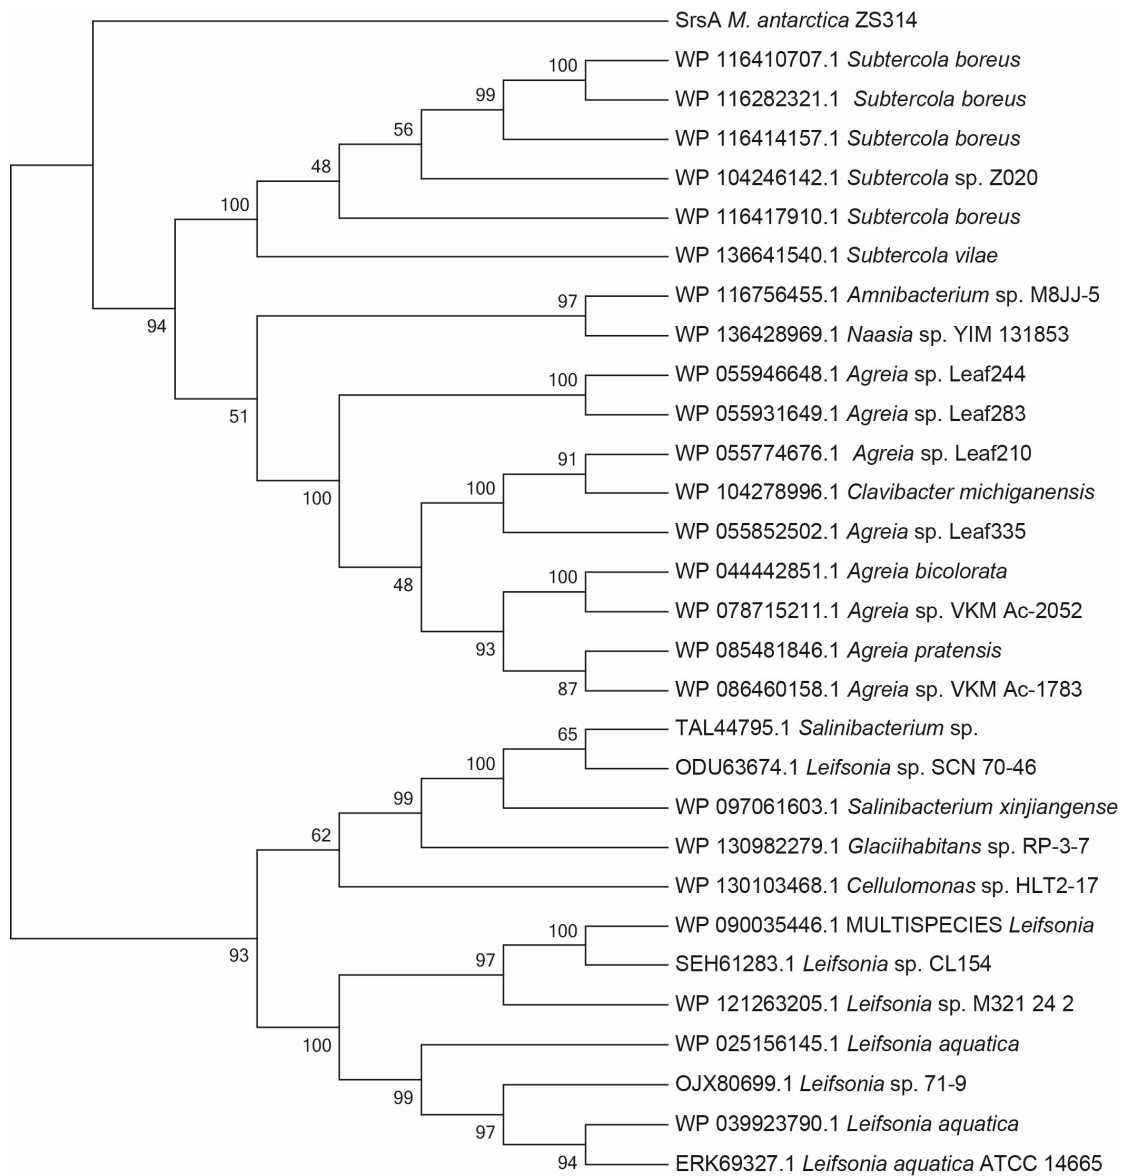

Figure S2. Phylogenetic tree of SrsA from *M. antarctica* ZS314 and close deposits in the NCBI Non-redundant protein sequences (nr) database.

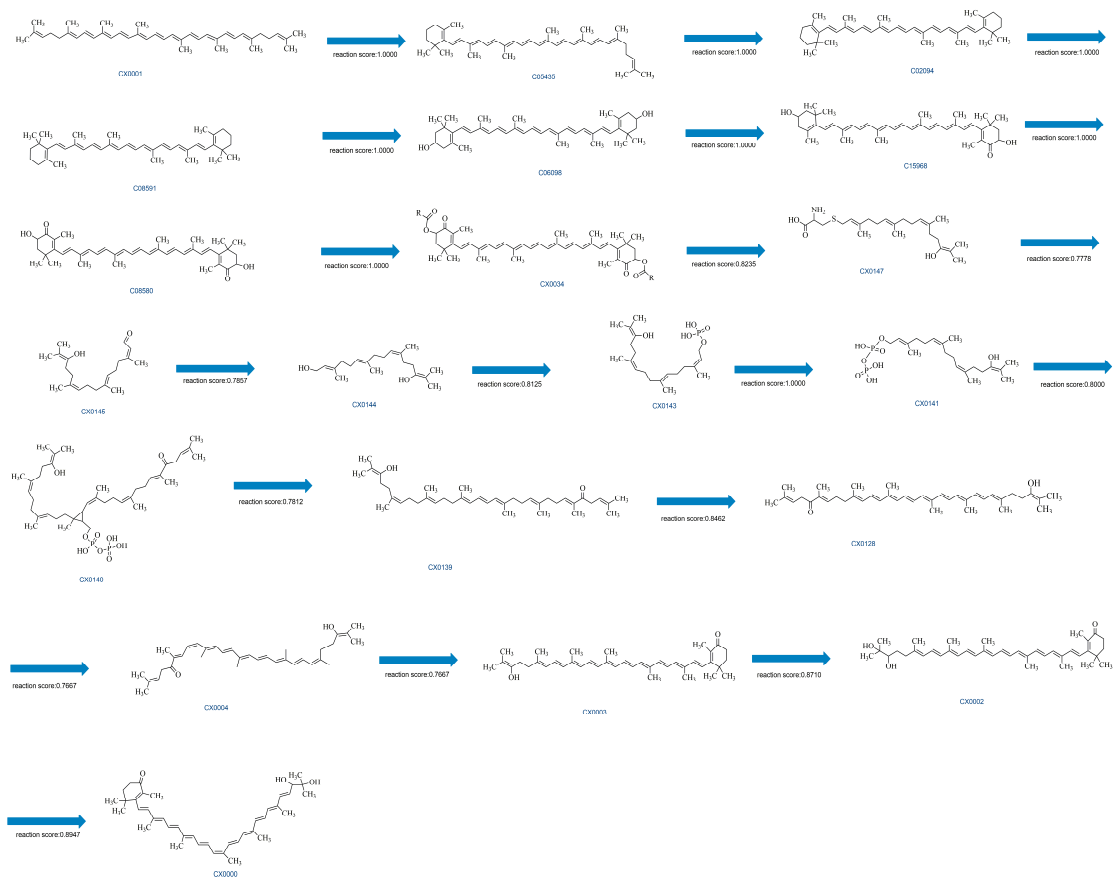

Figure S3: Reconstructed biosynthetic pathway of the core structure of salinixanthin without the glucose ester modification from lycopene.

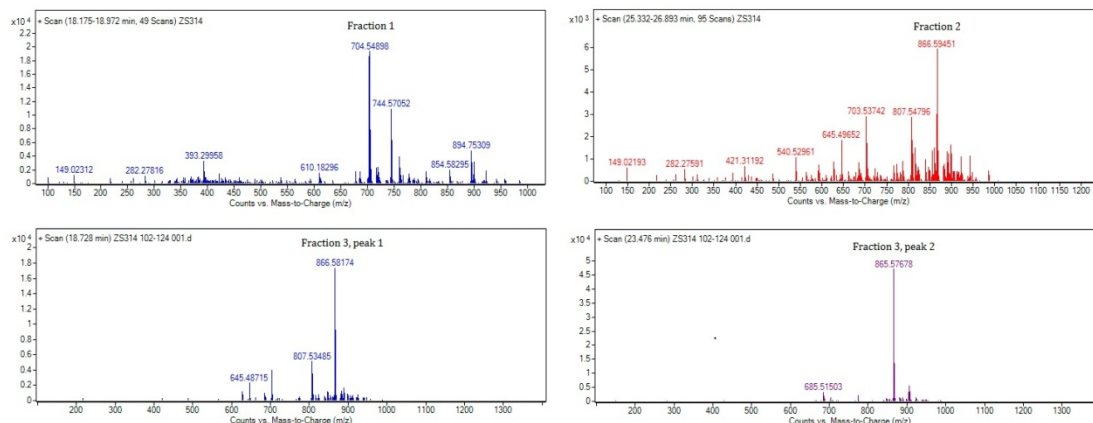

Figure S4. Mass spectrometry of the purified fractions from the methanolic extracts of the pigments produced by *M. antarctica* ZS314.

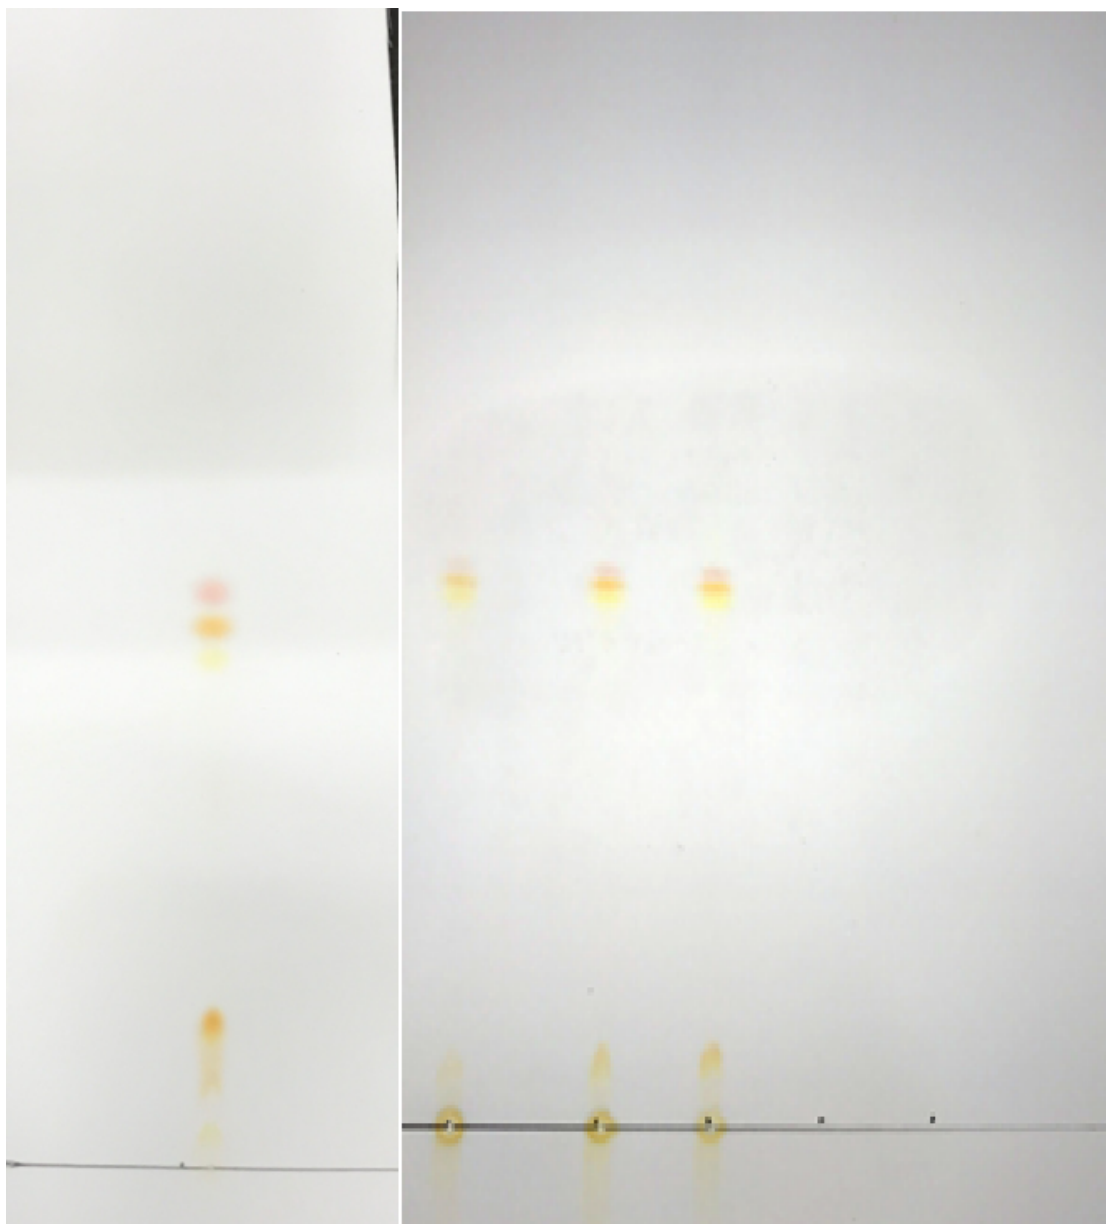

Figure S5: TLC profile of carotenoid-like pigments indicated by yellow and red colors.
